# Supplementary material
Source: PubMed Central journal article supplement (PMC8103356)
Supplement: NIHMS1653459-supplement-1.pdf [file NIHMS1653459-supplement-1.pdf]

**A**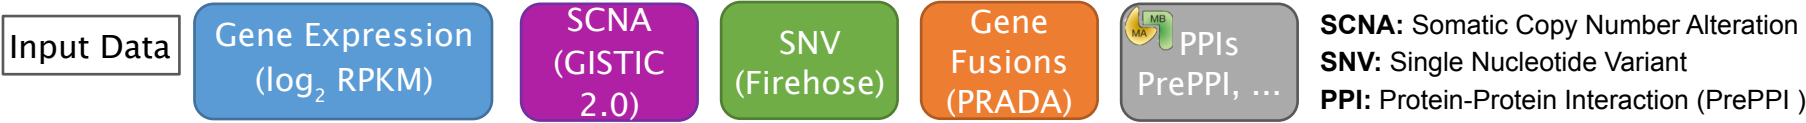**B****Step 1: Preliminary Data Processing**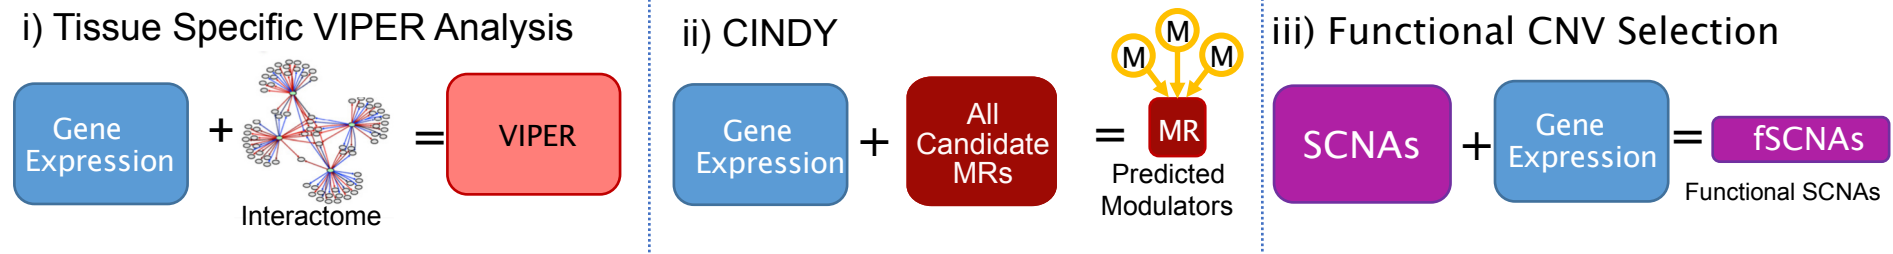**C****Step 2: aQTL Analysis**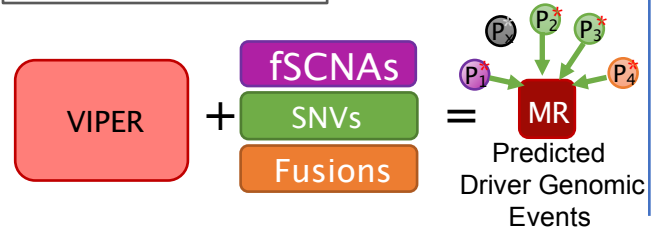**Step 3: Evidence Integration**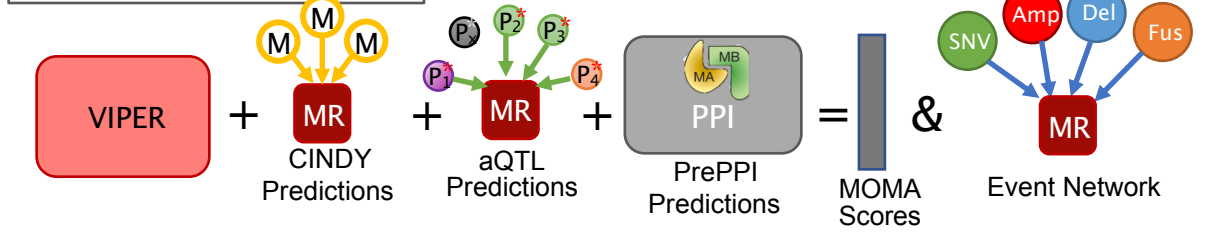**D****Step 4: Sample Clustering**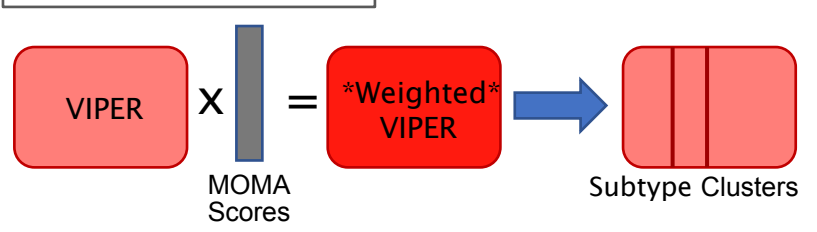**Step 5: Genomic Saturation and Checkpoint Determination**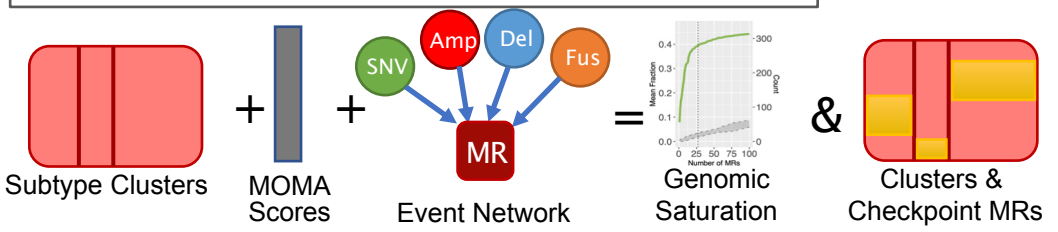**E****Step 6: MR Block Generation and Hallmarks of Cancer Enrichment**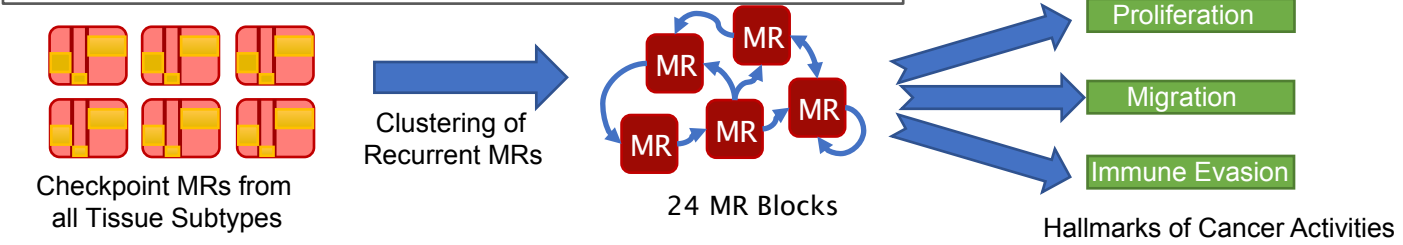**Figure S1**
