# Supplementary material
Source: PubMed Central journal article supplement (PMC8103356)

# Figure S3

## A

### Subtypes with MR-Block Active

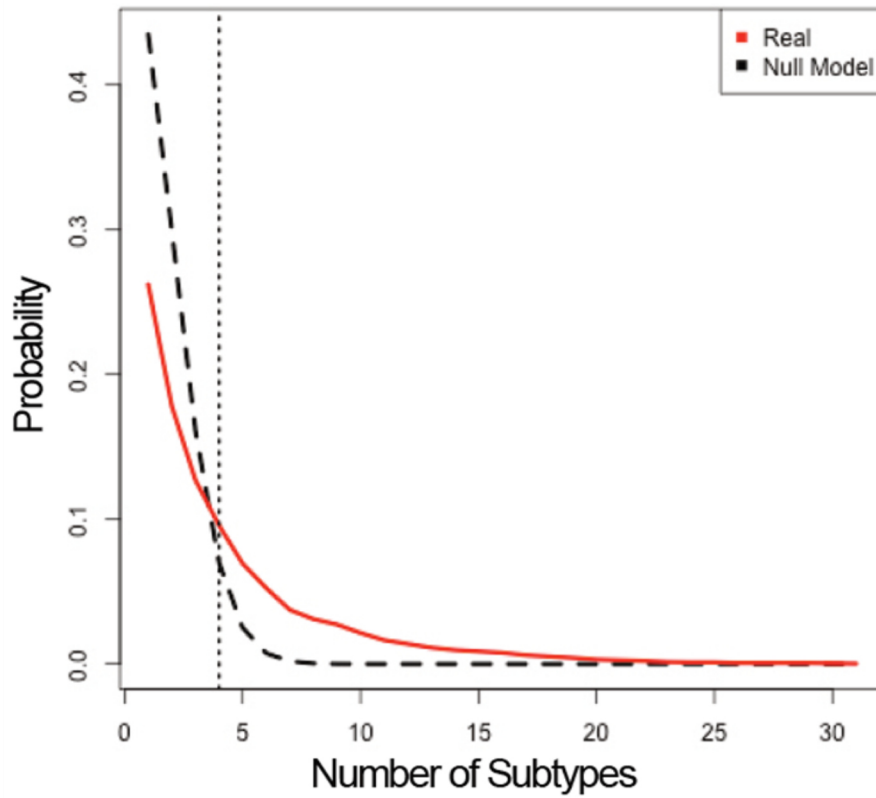

## B

### CHASM/GISTIC2 event enrichment upstream of Tumor Checkpoint MRs averaged on all cohort subtypes

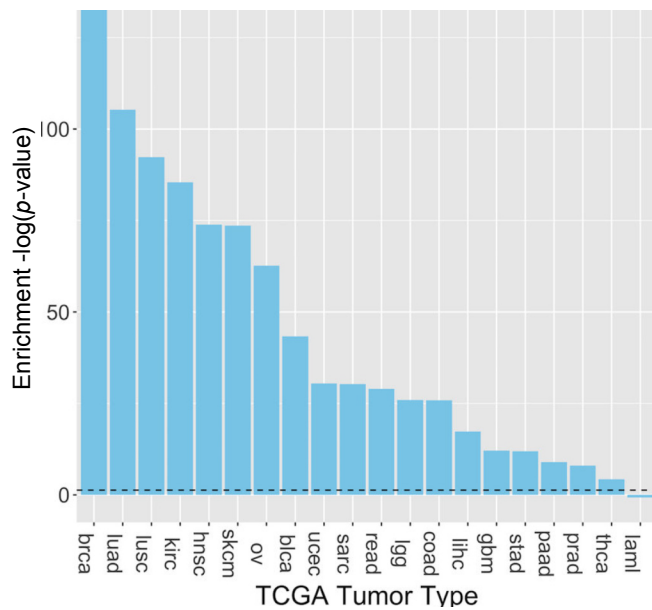

## C

### CHASM/GISTIC2 event enrichment fold-ratio upstream of Tumor Checkpoint MRs averaged on all cohort subtypes

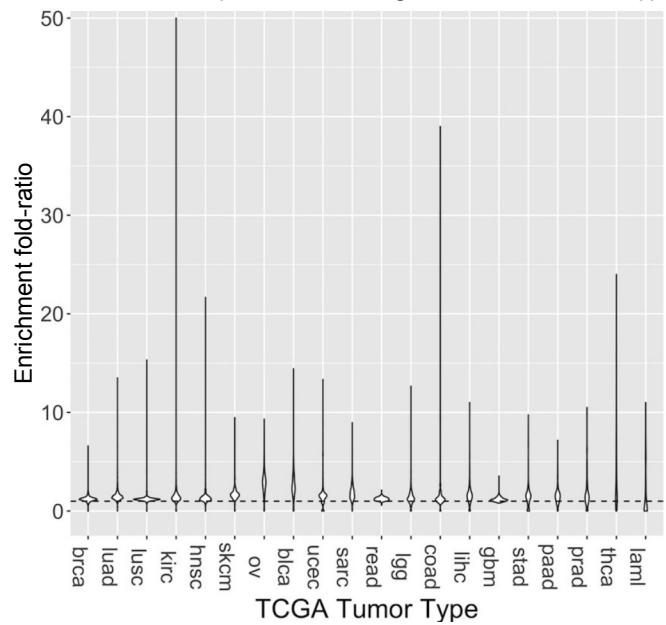

Supplement: NIHMS1653459-supplement-3.pdf [file NIHMS1653459-supplement-3.pdf]
