# Supplementary material
Source: PubMed Central journal article supplement (PMC8103356)

# Figure S2

## A

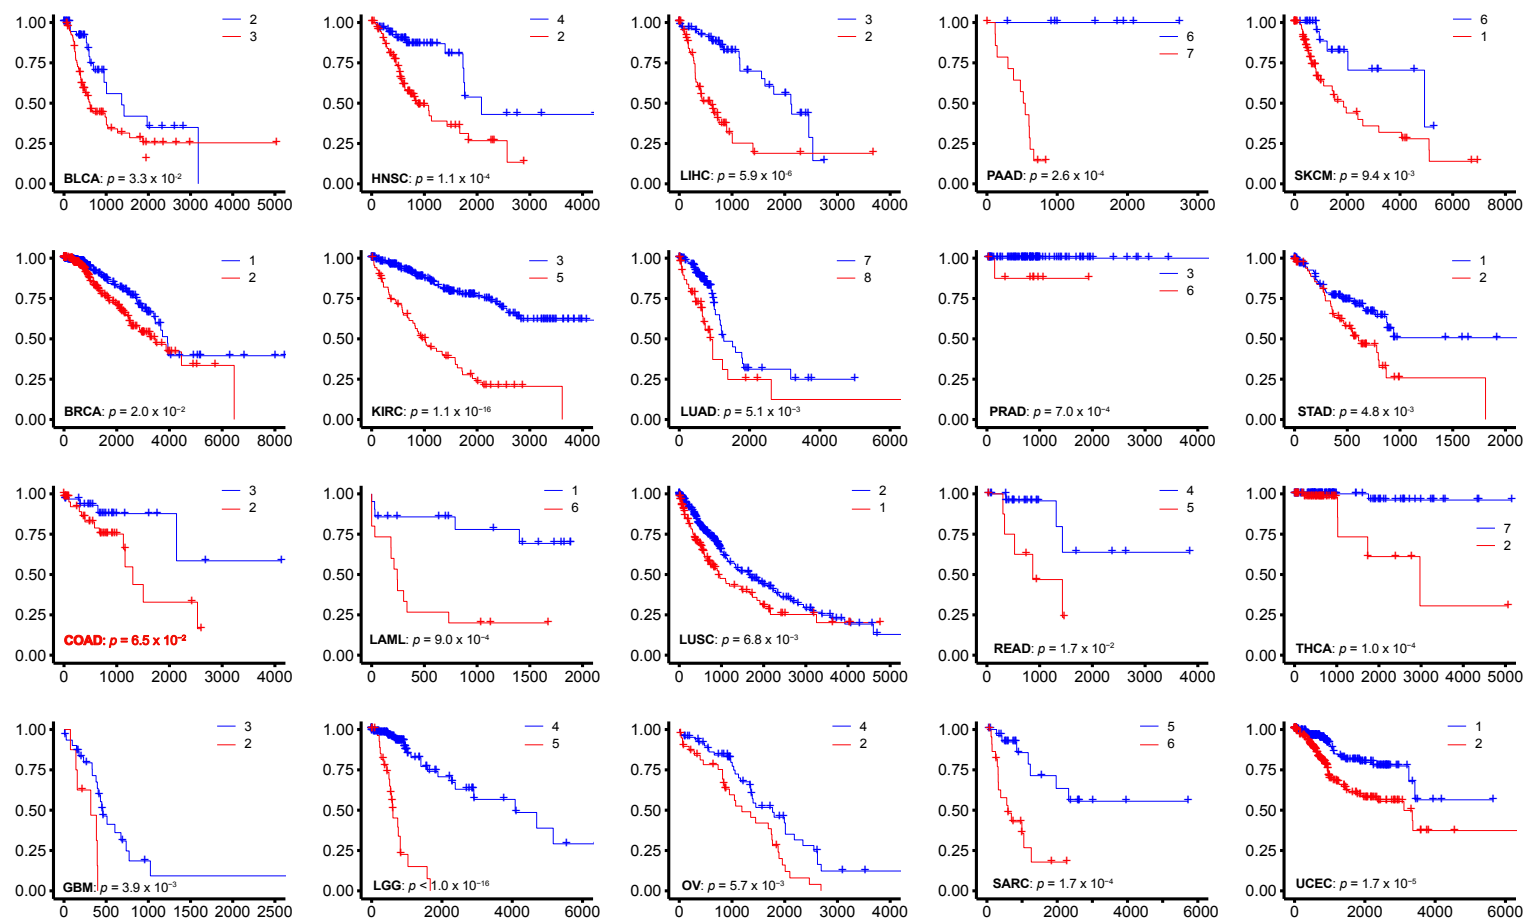

## B

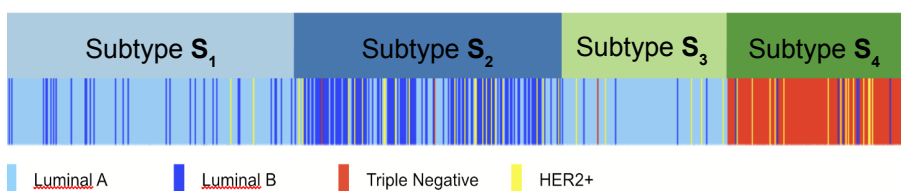

## D

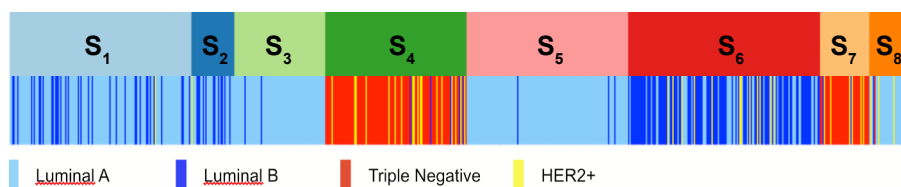

## C

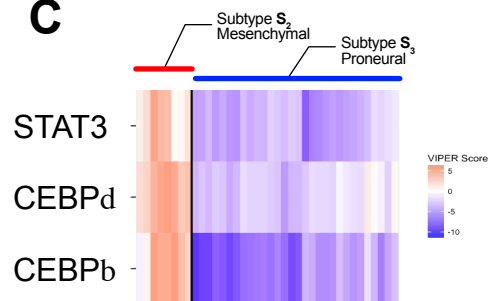

## E

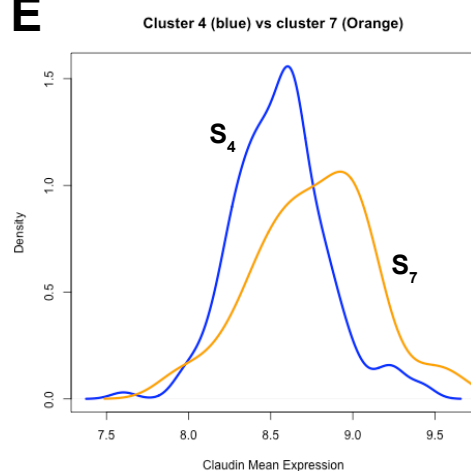

Supplement: NIHMS1653459-supplement-2.pdf [file NIHMS1653459-supplement-2.pdf]

# Figure S4

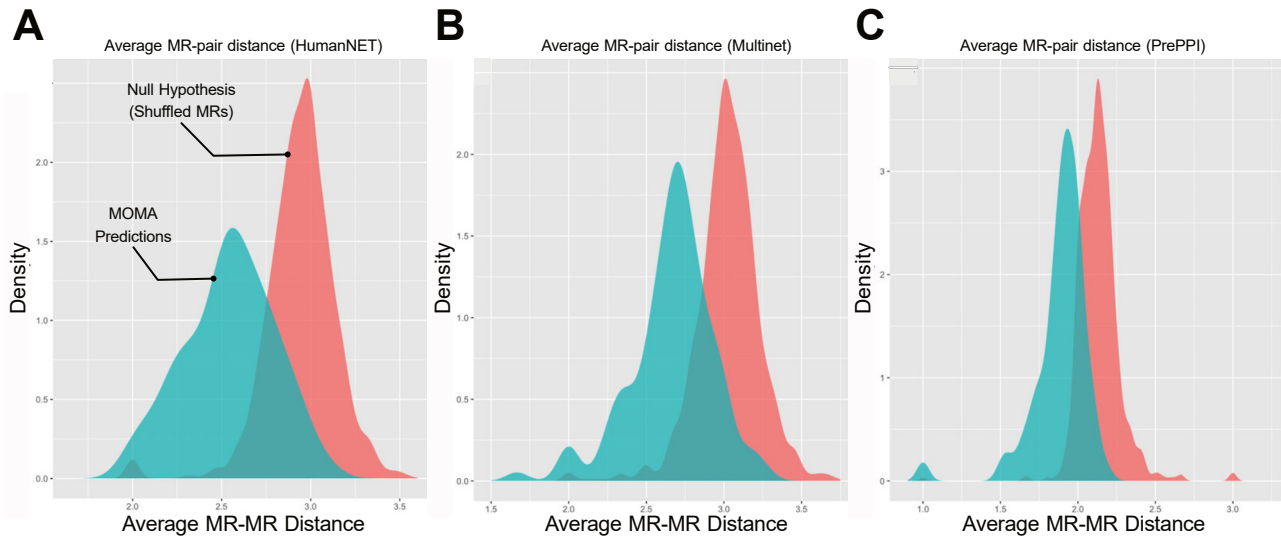

Supplement: NIHMS1653459-supplement-4.pdf [file NIHMS1653459-supplement-4.pdf]

# Figure S5

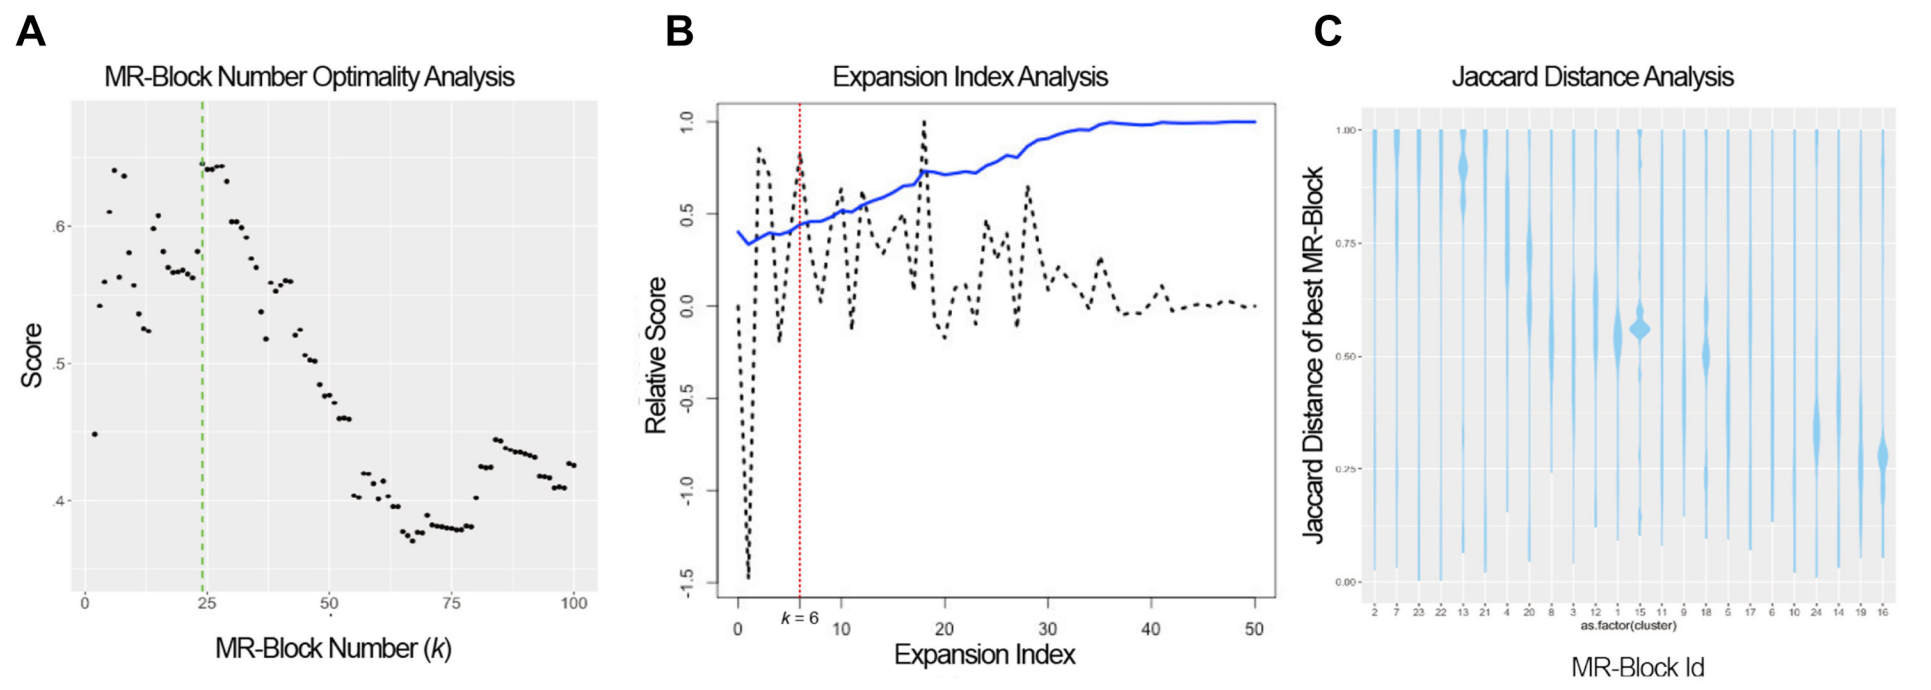

## D MR-Block KEGG and Reactome Enrichment

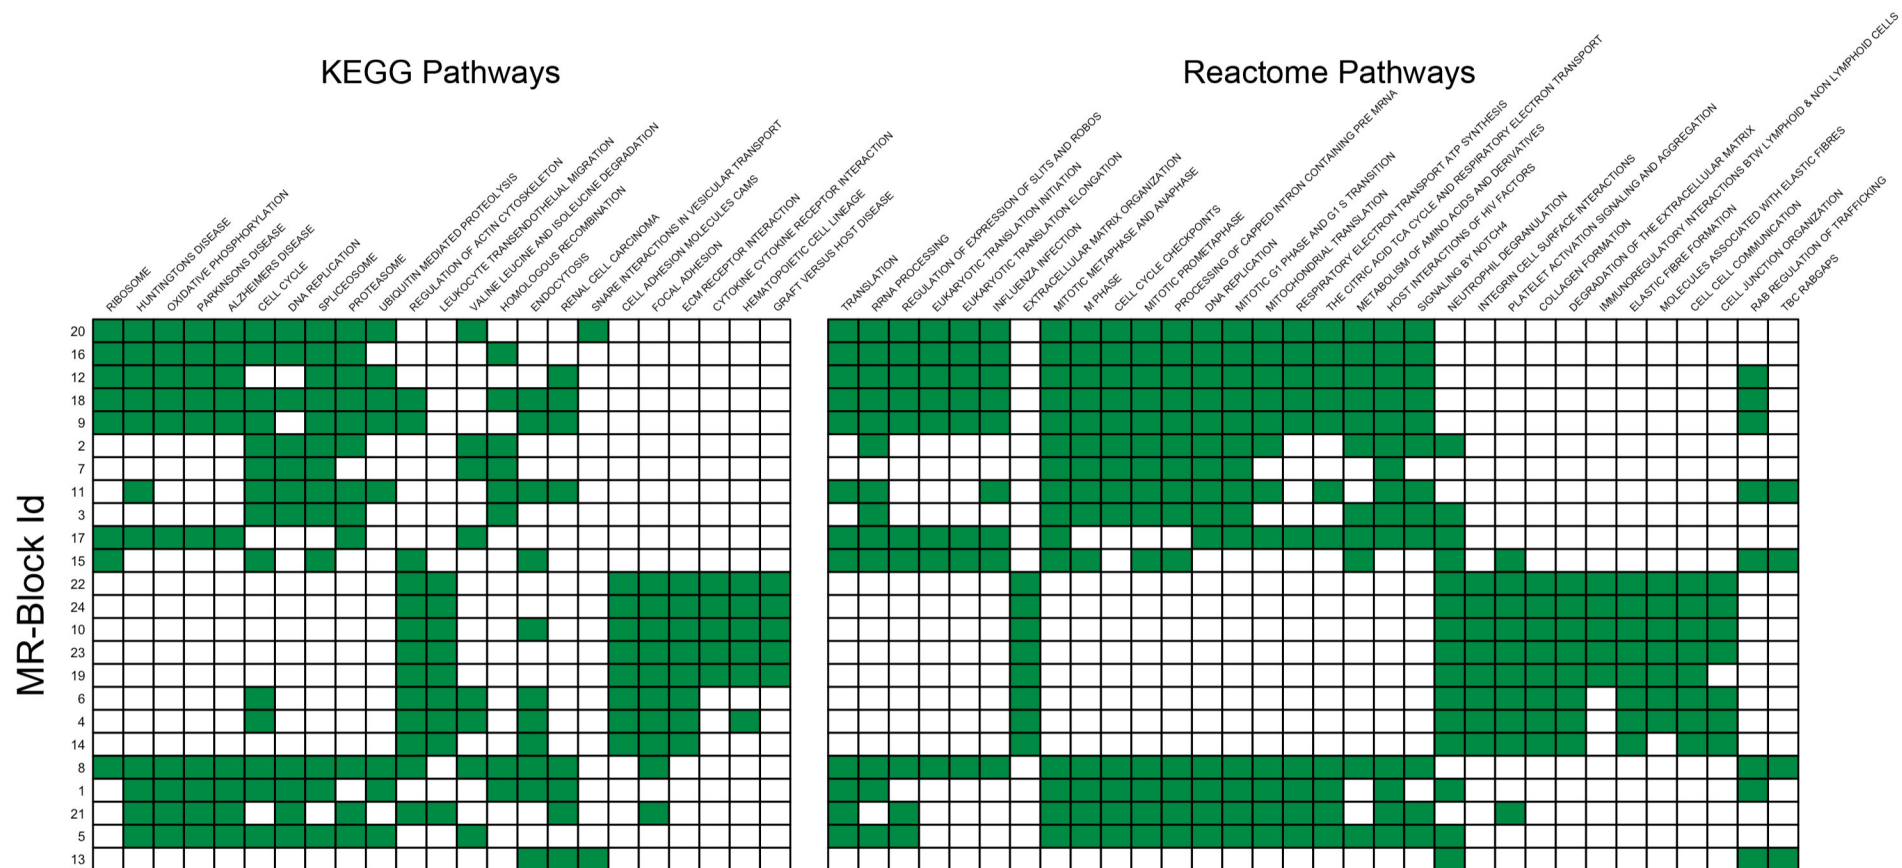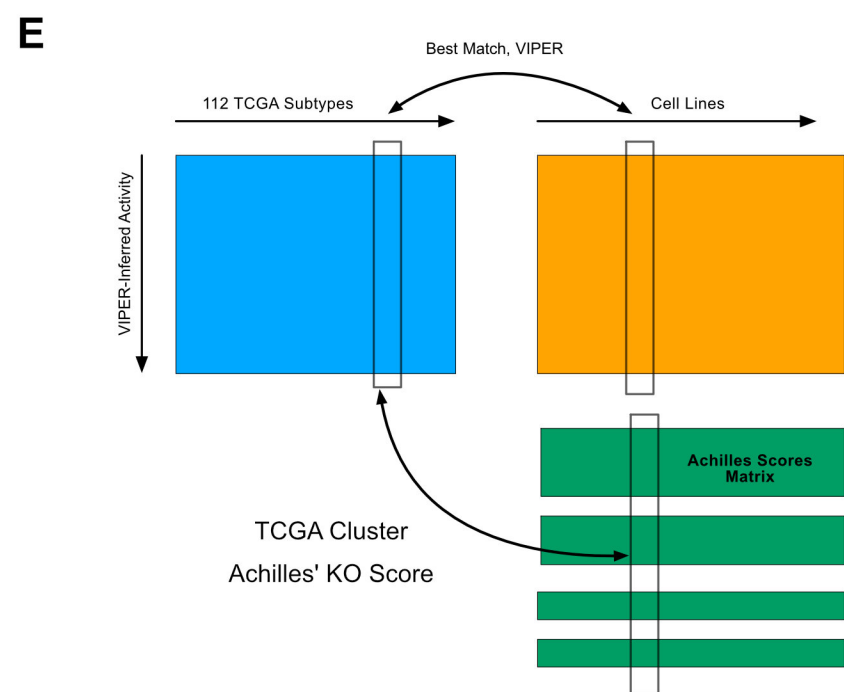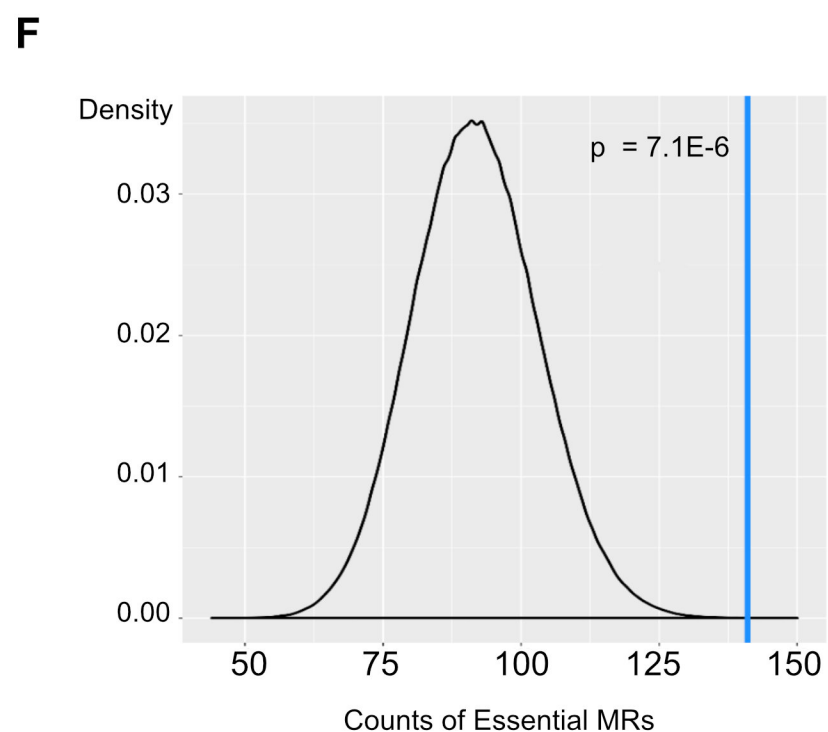

Supplement: NIHMS1653459-supplement-5.pdf [file NIHMS1653459-supplement-5.pdf]

# Figure S6

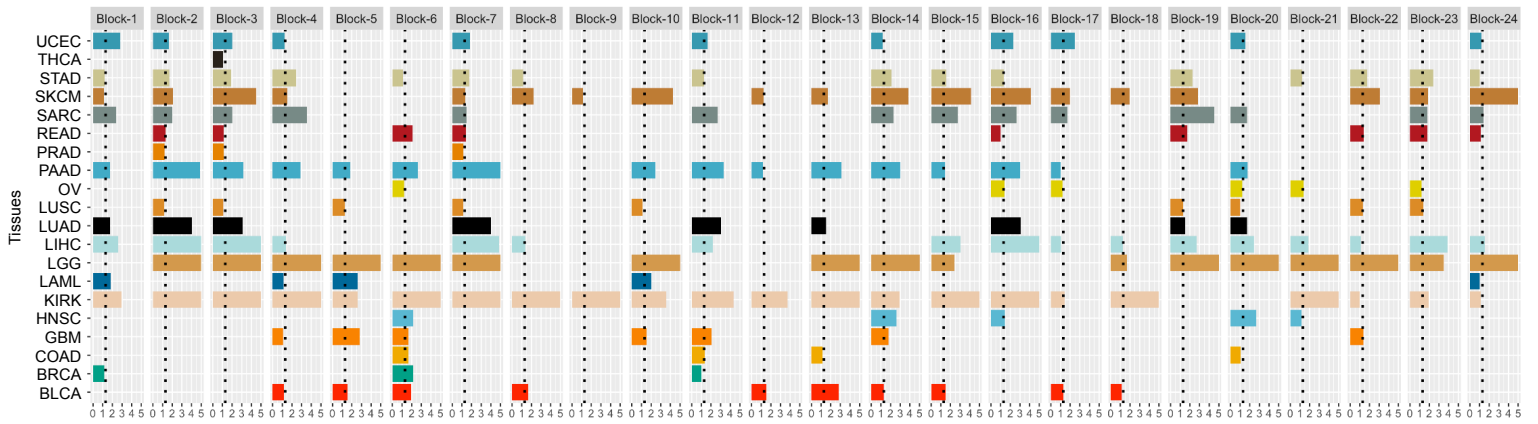

**B**

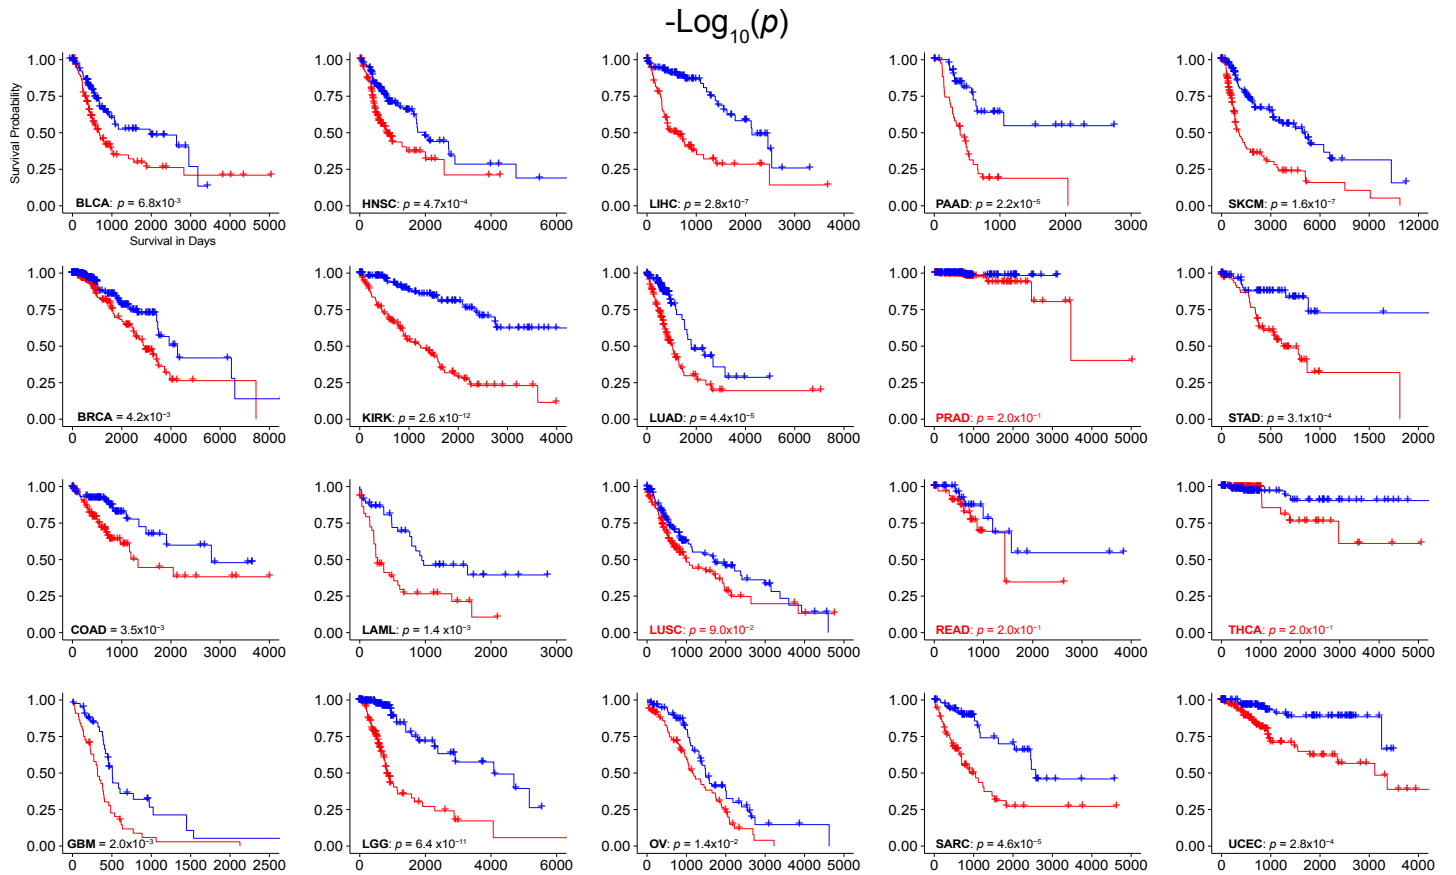

**C**

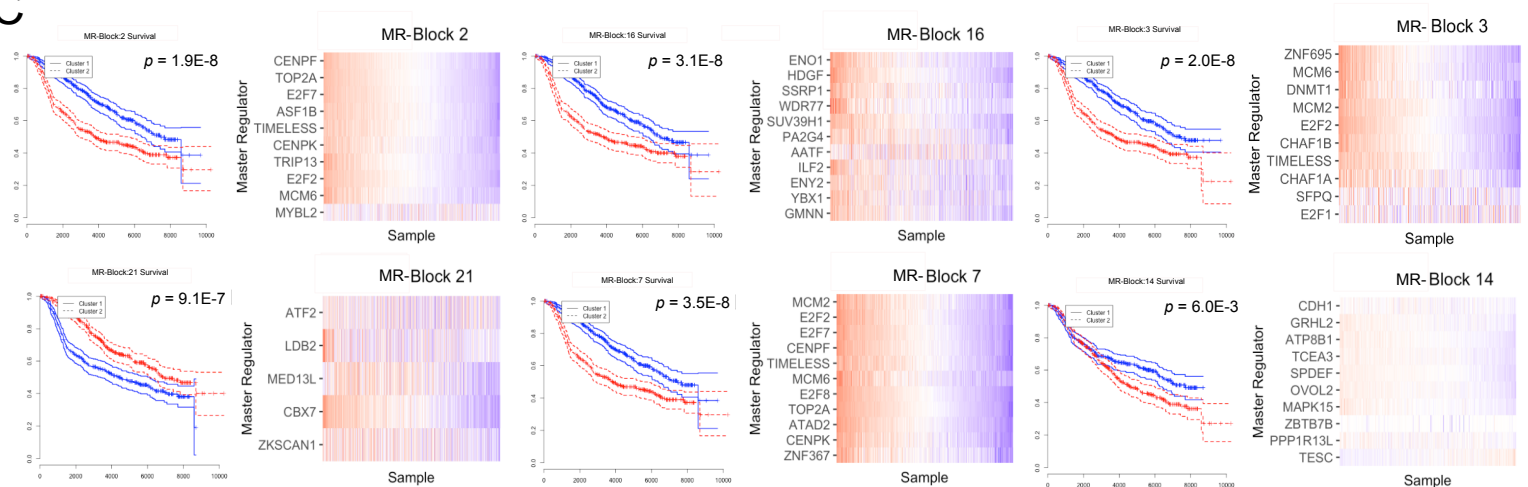

Supplement: NIHMS1653459-supplement-6.pdf [file NIHMS1653459-supplement-6.pdf]

# Figure S7

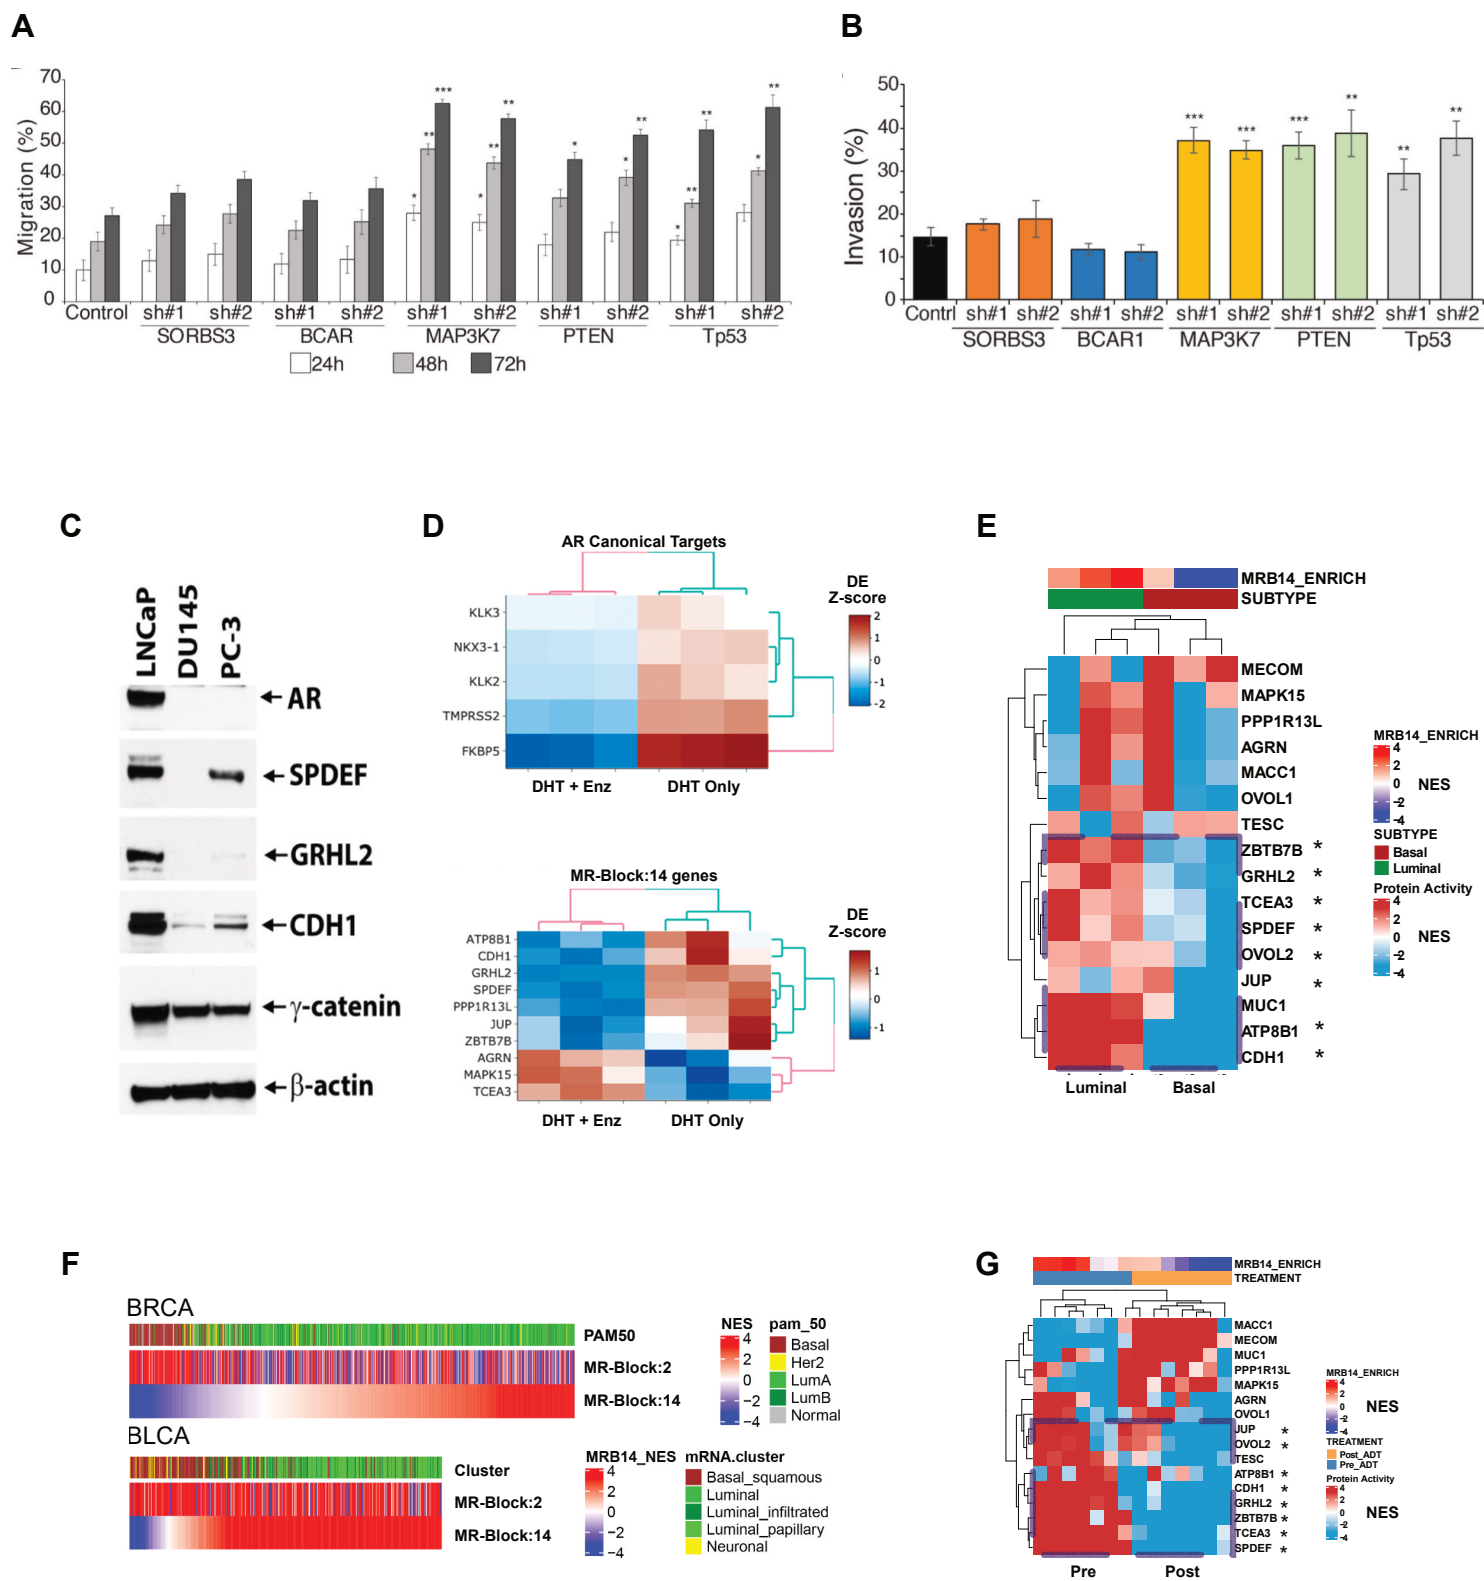

Supplement: NIHMS1653459-supplement-7.pdf [file NIHMS1653459-supplement-7.pdf]
